# Supplementary material for: Tracking Resilience to Infections by Mapping Disease Space
Source: PLoS Biol. 2016 Apr 18;14(4):e1002436. doi: 10.1371/journal.pbio.1002436 (PMC4835107; doi:10.1371/journal.pbio.1002436)
Supplement: S2 Data — (XLSX) [file pbio.1002436.s002.xlsx]

## Sheet: Fig6A 
Days Post Infection	Nkg7	log 10 RBC	Mouse
0	-0.332466	8.12	4.3
0	-0.364701	7.49	3.3
1	-0.0979838	7.48	3.3
1	-0.148738	7.78	5.1
6	-0.250204	6.65	3.3
2	-0.636427	7.26	5.1
2	-0.617585	7.17	3.3
1	-0.7636	7.33	4.3
8	-0.316113	6.36	3.3
9	-0.806387	7.15	3.3
3	-0.769219	6.79	3.3
2	-0.78269	6.64	4.3
4	-0.791342	6.6	3.3
4	-0.703793	6.46	5.1
0	-1.41905	7.38	5.1
5	-0.498877	6.16	3.3
3	-1.04476	6.84	5.1
7	-0.144177	5.63	3.3
4	-0.728955	6.19	4.3
11	-0.943242	6.34	3.3
5	-0.619084	5.89	5.1
3	-0.760328	5.98	4.3
7	-0.878221	6.03	5.1
5	-0.91075	6	4.3
9	-0.610082	5.57	5.1
6	-1.11164	5.84	5.1
8	-0.795025	5.4	5.1
6	-1.23551	5.36	4.3
12	-0.892568	5.24	3.3
11	-0.951571	4.84	5.1
7	-1.06766	4.29	4.3
8	-0.936697	3.91	4.3
9	-0.675705	3.93	4.3
11	-0.764984	3.69	4.3
12	0.0661683	4.37	5.1
12	-1.0269	2.83	4.3
13	-0.571218	2.53	5.1
13	-0.0971484	1.37	4.3
14	0.0985875	2.06	3.3
13	0.450351	3.55	3.3
14	0.753437	1.95	5.1
14	0.80066	1.2	4.3
15	1.01468	1.37	3.3
15	0.986673	1.85	5.1
15	1.09151	1.22	4.3
16	1.77317	2.27	4.3
16	1.76709	2.8	3.3
16	2.27792	2.8	5.1
17	1.66481	4.16	4.3
17	1.91048	4.57	5.1
17	1.40617	5.09	3.3
18	1.53163	6.82	3.3
18	1.3791	7.33	5.1
18	1.08219	7.37	4.3
22	0.524082	7.91	5.1
25	0.501915	6.4	5.1
24	0.360889	9	5.1
25	0.392762	7.61	4.3
19	0.323659	7.61	4.3
24	0.19636	8.29	4.3
20	-0.580016	6.89	3.3
23	0.120059	8.04	3.3
25	0.0587182	8.12	3.3
21	0.0191369	8.32	4.3
22	-0.0191369	8.51	3.3
22	0.167257	7.07	4.3
19	0.143913	7.13	3.3
23	0.0603414	7.54	5.1
20	-0.598502	7.62	5.1
24	-0.118091	8.12	3.3
20	-0.68013	7.96	4.3
21	-0.091063	7.52	5.1
19	-0.300181	8.29	5.1
23	-0.121244	7.54	4.3
21	-0.303747	7.73	3.3

## Sheet:  Fig6B
Days Post Infection	Angle (degrees)
0	0
0	6.42978
1	6.69642
1	7.49879
6	13.3324
2	16.1002
2	16.7201
1	18.136
8	20.3674
9	21.1046
3	24.9263
2	27.2628
4	27.9943
4	28.3795
0	28.4207
5	29.0283
3	29.1209
7	31.3823
4	33.1626
11	34.2736
5	36.57
3	37.2273
7	38.0841
5	38.991
9	42.8257
6	43.6247
8	48.184
6	51.5476
12	51.8053
11	59.1514
7	68.237
8	75.4282
9	78.0611
11	81.2441
12	81.4933
12	90.0382
13	102.932
13	127.248
14	129.513
13	137.457
14	157.163
14	157.224
15	164.824
15	166.067
15	166.632
16	194.717
16	201.251
16	210.693
17	224.244
17	235.191
17	244.647
18	280.389
18	291.538
18	302.818
22	327.391
25	331.132
24	331.49
25	333.224
19	336.115
24	338.27
20	340.608
23	341.886
25	343.54
21	343.791
22	344.023
22	346.212
19	346.771
23	347.025
20	348.709
24	349.132
20	350.038
21	352.711
19	353.223
23	353.579
21	357.635
