# Supplementary material for: Tracking Resilience to Infections by Mapping Disease Space
Source: PLoS Biol. 2016 Apr 18;14(4):e1002436. doi: 10.1371/journal.pbio.1002436 (PMC4835107; doi:10.1371/journal.pbio.1002436)
Supplement: S3 Data — (XLSX) [file pbio.1002436.s003.xlsx]

## Sheet: Fig7A,E
individual	group	timept	log 2 (Fech)	log 10 (RBC)	Status	StatusNum	angle	radius
1.2	Dead	0	0.0126282	0.90961	Dead	0	127.953	0.96763
1.2	Dead	1	-0.122776	0.866848	Dead	0	136.947	0.973416
1.2	Dead	2	0.177827	0.800098	Dead	0	131.589	0.682994
1.2	Dead	3	0.10808	0.836102	Dead	0	130.839	0.784792
1.2	Dead	4	0.23442	0.858026	Dead	0	122.144	0.760836
1.2	Dead	5	-0.770656	0.832477	Dead	0	155.206	1.39589
1.2	Dead	6	-0.578465	0.896471	Dead	0	146.387	1.32362
1.2	Dead	7	-0.360361	0.620084	Dead	0	173.991	0.920216
1.2	Dead	10	-0.0357003	-0.0567529	Dead	0	246.473	1.59471
1.3	Live	0	0.0460847	0.867232	Live	1	130.405	0.873832
1.3	Live	1	0.269126	0.910571	Live	1	116.109	0.852158
1.3	Live	2	0.49917	0.908941	Live	1	103.131	0.78189
1.3	Live	3	0.525143	0.898944	Live	1	101.88	0.754592
1.3	Live	4	0.224121	0.911424	Live	1	118.333	0.871572
1.3	Live	5	0.451874	0.878263	Live	1	107.53	0.724454
1.3	Live	6	0.439724	0.896664	Live	1	107.32	0.768001
1.3	Live	7	-0.203149	0.65021	Live	1	168.011	0.797662
1.3	Live	8	-0.152973	0.61595	Live	1	173.284	0.742302
1.3	Live	9	0.525716	0.416641	Live	1	247.406	0.40305
1.3	Live	10	1.141	0.282396	Live	1	298.709	0.776707
1.3	Live	11	1.61256	0.346646	Live	1	325.562	0.943006
1.3	Live	12	1.79358	0.599283	Live	1	2.97139	0.93431
1.3	Live	13	1.52611	0.760611	Live	1	30.8303	0.819332
1.3	Live	14	1.35392	0.775028	Live	1	39.1878	0.717085
1.3	Live	15	1.23808	0.721027	Live	1	35.7664	0.56248
2.1	Dead	1	0.359279	0.808549	Dead	0	119.307	0.608117
2.1	Dead	2	0.397333	0.805127	Dead	0	116.898	0.585781
2.1	Dead	3	0.559767	0.7406	Dead	0	108.576	0.394373
2.1	Dead	4	0.6833	0.848466	Dead	0	91.8075	0.622509
2.1	Dead	5	0.761896	0.92166	Dead	0	86.5403	0.792179
2.1	Dead	6	0.667432	0.902139	Dead	0	92.5528	0.746526
2.1	Dead	7	0.0780057	0.669038	Dead	0	158.802	0.578133
2.1	Dead	8	-1.4835	0.304921	Dead	0	198.519	1.98149
2.1	Dead	9	-0.712192	-0.00722564	Dead	0	227.925	1.81621
2.1	Dead	10	-0.132357	-0.0373939	Dead	0	243.089	1.58972
2.2	Live	0	-0.036614	0.904337	Live	1	130.327	0.984888
2.2	Live	1	0.178631	0.872768	Live	1	123.723	0.815357
2.2	Live	2	0.354654	0.883945	Live	1	113.196	0.765798
2.2	Live	3	0.457384	0.904959	Live	1	105.843	0.781983
2.2	Live	4	0.385857	0.954869	Live	1	107.586	0.909717
2.2	Live	5	0.41826	0.88787	Live	1	109.113	0.754524
2.2	Live	6	0.325777	0.863769	Live	1	116.404	0.734006
2.2	Live	7	0.199215	0.782401	Live	1	132.781	0.640473
2.2	Live	8	-0.412786	0.576917	Live	1	180.183	0.960149
2.2	Live	9	0.246049	0.424473	Live	1	221.886	0.530338
2.2	Live	10	1.0319	0.282849	Live	1	292.338	0.735366
2.2	Live	11	1.45112	0.348986	Live	1	320.448	0.829006
2.2	Live	12	1.75299	0.525045	Live	1	352.234	0.906545
2.2	Live	13	1.62395	0.697491	Live	1	19.2213	0.833993
2.2	Live	14	1.31453	0.769599	Live	1	40.1664	0.68309
2.2	Live	15	1.0507	0.772872	Live	1	56.5886	0.536858
2.4	Live	0	0.397131	0.898369	Live	1	109.787	0.783355
2.4	Live	1	0.179967	0.860038	Live	1	124.834	0.79049
2.4	Live	2	0.829863	0.862638	Live	1	80.7944	0.663375
2.4	Live	3	0.70762	0.940093	Live	1	89.9151	0.833178
2.4	Live	4	0.754032	0.902846	Live	1	86.8557	0.748539
2.4	Live	5	0.778084	0.87271	Live	1	84.8007	0.680823
2.4	Live	6	0.47024	0.888573	Live	1	105.819	0.742674
2.4	Live	7	0.46936	0.811876	Live	1	110.694	0.575049
2.4	Live	8	-0.0440642	0.581836	Live	1	179.265	0.643811
2.4	Live	9	0.25307	0.294797	Live	1	239.218	0.759701
2.4	Live	10	0.10011	0.108734	Live	1	244.311	1.19968
2.4	Live	11	0.665005	0.0570953	Live	1	268.313	1.20052
2.4	Live	13	0.710936	0.113776	Live	1	270.219	1.06949
2.4	Live	14	1.49702	0.260191	Live	1	312.818	0.998412
2.4	Live	15	1.74089	0.547467	Live	1	355.436	0.890669
2.41	Dead	0	-0.286685	0.91474	Dead	0	137.715	1.15157
2.41	Dead	1	0.276807	0.910704	Dead	0	115.701	0.849554
2.41	Dead	2	0.532768	0.834866	Dead	0	104.135	0.60933
2.41	Dead	3	0.82637	0.698927	Dead	0	69.6382	0.296391
2.41	Dead	4	1.1346	0.718128	Dead	0	41.2234	0.488748
2.41	Dead	5	1.28328	0.687975	Dead	0	27.0317	0.555913
2.41	Dead	6	1.16874	0.688509	Dead	0	32.6055	0.471156
2.41	Dead	7	1.02324	0.629512	Dead	0	23.4545	0.29656
2.41	Dead	8	0.523251	0.263281	Dead	0	257.788	0.742032
2.41	Dead	9	0.0269765	-0.0703257	Dead	0	248.682	1.60309
2.5	Live	0	-0.00695885	0.891259	Live	1	130.332	0.945463
2.5	Dead	0	0.668755	0.905634	Dead	0	92.4395	0.754516
2.5	Live	1	0.0392476	0.864363	Live	1	130.979	0.872648
2.5	Dead	1	0.817671	0.827595	Dead	0	80.5402	0.582057
2.5	Live	2	0.124216	0.896692	Live	1	124.256	0.887134
2.5	Dead	2	0.879716	0.829143	Dead	0	75.5466	0.596587
2.5	Live	3	0.33295	0.887308	Live	1	114.229	0.780377
2.5	Dead	3	0.99598	0.726197	Dead	0	53.8728	0.421765
2.5	Live	4	0.387414	0.903849	Live	1	110.044	0.79806
2.5	Dead	4	1.21898	0.703893	Dead	0	33.3246	0.526605
2.5	Live	5	0.329865	0.838755	Live	1	118.294	0.681228
2.5	Dead	5	1.25878	0.760422	Dead	0	41.4976	0.633079
2.5	Live	6	-0.311135	0.82808	Live	1	146.615	1.04542
2.5	Dead	6	1.1742	0.661529	Dead	0	25.5245	0.445024
2.5	Live	7	-0.271318	0.732193	Live	1	157.09	0.910582
2.5	Dead	7	1.33841	0.576859	Dead	0	359.662	0.542501
2.5	Live	8	-0.596701	0.519828	Live	1	186.861	1.12602
2.5	Dead	8	0.182454	0.178689	Dead	0	243.966	1.02391
2.5	Live	9	0.674177	0.315656	Live	1	267.399	0.605266
2.5	Live	10	1.36047	0.212454	Live	1	303.686	1.01223
2.5	Live	11	1.6246	0.335759	Live	1	324.682	0.965813
2.5	Live	12	1.81245	0.551145	Live	1	356.238	0.951296
2.5	Live	13	1.5372	0.725912	Live	1	25.493	0.789977
2.5	Live	14	1.34442	0.63488	Live	1	13.3932	0.562957
2.5	Live	15	1.344	0.636087	Live	1	13.6765	0.563259
2.51	Dead	0	0.456728	0.806824	Dead	0	112.131	0.568175
2.51	Dead	2	0.849317	0.701741	Dead	0	66.6392	0.309742
2.51	Dead	4	1.15192	0.754042	Dead	0	46.6229	0.556896
2.51	Dead	5	1.17963	0.797718	Dead	0	51.2042	0.648391
2.51	Dead	6	1.00007	0.791761	Dead	0	62.8452	0.552532
2.51	Dead	7	0.528623	0.67619	Dead	0	124.042	0.272161
2.51	Dead	8	-0.188063	0.211388	Dead	0	227.749	1.1412
2.51	Dead	9	-0.0310922	-0.10902	Dead	0	248.21	1.70426
3.1	Dead	0	-0.0591361	0.849389	Dead	0	136.447	0.906102
3.1	Dead	1	0.458392	0.839886	Dead	0	109.439	0.638862
3.1	Dead	2	0.77881	0.692009	Dead	0	76.6175	0.269255
3.1	Dead	3	1.06171	0.896168	Dead	0	67.377	0.793057
3.1	Dead	4	1.29302	0.77144	Dead	0	41.4581	0.671891
3.1	Dead	5	1.25097	0.787885	Dead	0	45.9193	0.671956
3.1	Dead	6	1.12248	0.817036	Dead	0	56.989	0.655677
3.1	Dead	7	0.86121	0.631647	Dead	0	42.7472	0.181143
3.1	Dead	8	-0.200158	0.310693	Dead	0	218.385	0.992145
3.1	Dead	9	0.0730752	-0.0838093	Dead	0	250.386	1.61835
3.5	Dead	0	0.434429	0.909449	Dead	0	107.002	0.79747
3.5	Dead	1	0.297392	0.840859	Dead	0	120.117	0.699055
3.5	Dead	2	0.391996	0.863888	Dead	0	112.288	0.710816
3.5	Dead	3	0.498573	0.861505	Dead	0	105.277	0.676111
3.5	Dead	4	0.36263	0.83512	Dead	0	116.492	0.660859
3.5	Dead	5	0.830352	0.831326	Dead	0	79.6386	0.592392
3.5	Dead	6	0.870855	0.855701	Dead	0	77.5283	0.654297
3.5	Dead	7	0.666775	0.739177	Dead	0	95.214	0.37209
3.5	Dead	8	-0.610472	0.269746	Dead	0	212.16	1.33454
3.5	Dead	9	-0.000907776	0.0948204	Dead	0	241.407	1.26775
4.1	Dead	0	0.578644	0.829497	Dead	0	100.712	0.58878
4.1	Dead	1	0.297585	0.586868	Dead	0	176.76	0.351163
4.1	Dead	2	0.34393	0.589	Dead	0	175.447	0.311819
4.1	Dead	3	0.561693	0.615897	Dead	0	145.038	0.151282
4.1	Dead	4	0.517345	0.62024	Dead	0	149.175	0.18869
4.1	Dead	5	0.431902	0.673297	Dead	0	137.079	0.321385
4.1	Dead	6	0.331317	0.504335	Dead	0	207.884	0.363908
4.1	Dead	7	-0.0464145	0.146128	Dead	0	237.015	1.18619
4.1	Dead	8	-0.272995	-0.135489	Dead	0	242.922	1.84576
4.3	Dead	0	0.157299	0.896113	Dead	0	122.761	0.87035
4.3	Dead	1	0.328005	0.913257	Dead	0	112.815	0.836861
4.3	Dead	2	0.740876	0.779344	Dead	0	86.3214	0.463995
4.3	Dead	3	0.898416	0.852602	Dead	0	75.3662	0.652902
4.3	Dead	4	1.02137	0.89451	Dead	0	69.6256	0.776818
4.3	Dead	5	1.04638	0.844073	Dead	0	64.503	0.678128
4.3	Dead	6	0.879405	0.863323	Dead	0	77.2412	0.673026
4.3	Dead	7	0.595044	0.811173	Dead	0	100.082	0.54474
4.3	Dead	8	-0.107334	0.512217	Dead	0	192.288	0.714414
4.3	Dead	9	-0.0121409	0.258637	Dead	0	230.053	0.95995
4.3	Dead	10	-0.0774732	0.119256	Dead	0	237.534	1.25265
4.5	Dead	0	-0.385217	0.957152	Dead	0	137.027	1.27992
4.5	Dead	1	-0.333408	0.868938	Dead	0	143.117	1.11523
4.5	Dead	2	-0.0201207	0.830973	Dead	0	136.962	0.852658
4.5	Dead	3	-0.0874802	0.859018	Dead	0	136.489	0.939007
4.5	Dead	4	-0.0685403	0.86362	Dead	0	135.332	0.934706
4.5	Dead	5	0.141797	0.86785	Dead	0	125.988	0.82413
4.5	Dead	6	0.00157137	0.853972	Dead	0	133.601	0.876703
4.5	Dead	7	-0.209738	0.670153	Dead	0	164.93	0.813908
4.5	Dead	8	-0.515428	0.303844	Dead	0	211.081	1.22392
4.5	Dead	9	-1.76343	0.236663	Dead	0	200.363	2.26034
5.5	Dead	0	0.925727	0.787177	Dead	0	68.6153	0.516645
5.5	Dead	1	1.02723	0.781217	Dead	0	59.4832	0.542498
5.5	Dead	2	1.13536	0.850187	Dead	0	59.5393	0.726424
5.5	Dead	3	0.810207	0.86359	Dead	0	82.2635	0.663059
5.5	Dead	4	0.861941	0.855065	Dead	0	78.1576	0.651254
5.5	Dead	5	0.672843	0.670849	Dead	0	97.6416	0.21513
5.5	Dead	6	0.772685	0.63058	Dead	0	64.6594	0.133327
5.5	Dead	7	0.727072	0.487138	Dead	0	274.884	0.210554
5.5	Dead	8	0.230279	0.0511525	Dead	0	251.404	1.28054

## Sheet: Fig7B,F
angle	radius	Status
127.953	0.96763	Dead
136.947	0.973416	Dead
131.589	0.682994	Dead
130.839	0.784792	Dead
122.144	0.760836	Dead
155.206	1.39589	Dead
146.387	1.32362	Dead
173.991	0.920216	Dead
246.473	1.59471	Dead
130.405	0.873832	Live
116.109	0.852158	Live
103.131	0.78189	Live
101.88	0.754592	Live
118.333	0.871572	Live
107.53	0.724454	Live
107.32	0.768001	Live
168.011	0.797662	Live
173.284	0.742302	Live
247.406	0.40305	Live
298.709	0.776707	Live
325.562	0.943006	Live
2.97139	0.93431	Live
30.8303	0.819332	Live
39.1878	0.717085	Live
35.7664	0.56248	Live
119.307	0.608117	Dead
116.898	0.585781	Dead
108.576	0.394373	Dead
91.8075	0.622509	Dead
86.5403	0.792179	Dead
92.5528	0.746526	Dead
158.802	0.578133	Dead
198.519	1.98149	Dead
227.925	1.81621	Dead
243.089	1.58972	Dead
130.327	0.984888	Live
123.723	0.815357	Live
113.196	0.765798	Live
105.843	0.781983	Live
107.586	0.909717	Live
109.113	0.754524	Live
116.404	0.734006	Live
132.781	0.640473	Live
180.183	0.960149	Live
221.886	0.530338	Live
292.338	0.735366	Live
320.448	0.829006	Live
352.234	0.906545	Live
19.2213	0.833993	Live
40.1664	0.68309	Live
56.5886	0.536858	Live
109.787	0.783355	Live
124.834	0.79049	Live
80.7944	0.663375	Live
89.9151	0.833178	Live
86.8557	0.748539	Live
84.8007	0.680823	Live
105.819	0.742674	Live
110.694	0.575049	Live
179.265	0.643811	Live
239.218	0.759701	Live
244.311	1.19968	Live
268.313	1.20052	Live
270.219	1.06949	Live
312.818	0.998412	Live
355.436	0.890669	Live
137.715	1.15157	Dead
115.701	0.849554	Dead
104.135	0.60933	Dead
69.6382	0.296391	Dead
41.2234	0.488748	Dead
27.0317	0.555913	Dead
32.6055	0.471156	Dead
23.4545	0.29656	Dead
257.788	0.742032	Dead
248.682	1.60309	Dead
130.332	0.945463	Live
92.4395	0.754516	Dead
130.979	0.872648	Live
80.5402	0.582057	Dead
124.256	0.887134	Live
75.5466	0.596587	Dead
114.229	0.780377	Live
53.8728	0.421765	Dead
110.044	0.79806	Live
33.3246	0.526605	Dead
118.294	0.681228	Live
41.4976	0.633079	Dead
146.615	1.04542	Live
25.5245	0.445024	Dead
157.09	0.910582	Live
359.662	0.542501	Dead
186.861	1.12602	Live
243.966	1.02391	Dead
267.399	0.605266	Live
303.686	1.01223	Live
324.682	0.965813	Live
356.238	0.951296	Live
25.493	0.789977	Live
13.3932	0.562957	Live
13.6765	0.563259	Live
112.131	0.568175	Dead
66.6392	0.309742	Dead
46.6229	0.556896	Dead
51.2042	0.648391	Dead
62.8452	0.552532	Dead
124.042	0.272161	Dead
227.749	1.1412	Dead
248.21	1.70426	Dead
136.447	0.906102	Dead
109.439	0.638862	Dead
76.6175	0.269255	Dead
67.377	0.793057	Dead
41.4581	0.671891	Dead
45.9193	0.671956	Dead
56.989	0.655677	Dead
42.7472	0.181143	Dead
218.385	0.992145	Dead
250.386	1.61835	Dead
107.002	0.79747	Dead
120.117	0.699055	Dead
112.288	0.710816	Dead
105.277	0.676111	Dead
116.492	0.660859	Dead
79.6386	0.592392	Dead
77.5283	0.654297	Dead
95.214	0.37209	Dead
212.16	1.33454	Dead
241.407	1.26775	Dead
100.712	0.58878	Dead
176.76	0.351163	Dead
175.447	0.311819	Dead
145.038	0.151282	Dead
149.175	0.18869	Dead
137.079	0.321385	Dead
207.884	0.363908	Dead
237.015	1.18619	Dead
242.922	1.84576	Dead
122.761	0.87035	Dead
112.815	0.836861	Dead
86.3214	0.463995	Dead
75.3662	0.652902	Dead
69.6256	0.776818	Dead
64.503	0.678128	Dead
77.2412	0.673026	Dead
100.082	0.54474	Dead
192.288	0.714414	Dead
230.053	0.95995	Dead
237.534	1.25265	Dead
137.027	1.27992	Dead
143.117	1.11523	Dead
136.962	0.852658	Dead
136.489	0.939007	Dead
135.332	0.934706	Dead
125.988	0.82413	Dead
133.601	0.876703	Dead
164.93	0.813908	Dead
211.081	1.22392	Dead
200.363	2.26034	Dead
68.6153	0.516645	Dead
59.4832	0.542498	Dead
59.5393	0.726424	Dead
82.2635	0.663059	Dead
78.1576	0.651254	Dead
97.6416	0.21513	Dead
64.6594	0.133327	Dead
274.884	0.210554	Dead
251.404	1.28054	Dead

## Sheet: Fig7C,D
group	angle	radius
Dead	173.991	0.920216
Dead	246.473	1.59471
Live	168.011	0.797662
Live	173.284	0.742302
Live	247.406	0.40305
Dead	198.519	1.98149
Dead	227.925	1.81621
Dead	243.089	1.58972
Live	180.183	0.960149
Live	221.886	0.530338
Live	179.265	0.643811
Live	239.218	0.759701
Live	244.311	1.19968
Live	268.313	1.20052
Dead	257.788	0.742032
Dead	248.682	1.60309
Live	186.861	1.12602
Dead	243.966	1.02391
Live	267.399	0.605266
Dead	227.749	1.1412
Dead	248.21	1.70426
Dead	218.385	0.992145
Dead	250.386	1.61835
Dead	212.16	1.33454
Dead	241.407	1.26775
Dead	176.76	0.351163
Dead	175.447	0.311819
Dead	207.884	0.363908
Dead	237.015	1.18619
Dead	242.922	1.84576
Dead	192.288	0.714414
Dead	230.053	0.95995
Dead	237.534	1.25265
Dead	164.93	0.813908
Dead	211.081	1.22392
Dead	200.363	2.26034
Dead	251.404	1.28054

## Sheet: Fig7G,H
Status	angle	radius
Dead	127.953	0.96763
Dead	136.947	0.973416
Dead	131.589	0.682994
Dead	130.839	0.784792
Dead	122.144	0.760836
Live	130.405	0.873832
Live	116.109	0.852158
Live	103.131	0.78189
Live	101.88	0.754592
Live	118.333	0.871572
Live	107.53	0.724454
Live	107.32	0.768001
Dead	119.307	0.608117
Dead	116.898	0.585781
Dead	108.576	0.394373
Dead	91.8075	0.622509
Dead	86.5403	0.792179
Dead	92.5528	0.746526
Live	130.327	0.984888
Live	123.723	0.815357
Live	113.196	0.765798
Live	105.843	0.781983
Live	107.586	0.909717
Live	109.113	0.754524
Live	116.404	0.734006
Live	132.781	0.640473
Live	56.5886	0.536858
Live	109.787	0.783355
Live	124.834	0.79049
Live	80.7944	0.663375
Live	89.9151	0.833178
Live	86.8557	0.748539
Live	84.8007	0.680823
Live	105.819	0.742674
Live	110.694	0.575049
Dead	137.715	1.15157
Dead	115.701	0.849554
Dead	104.135	0.60933
Dead	69.6382	0.296391
Live	130.332	0.945463
Dead	92.4395	0.754516
Live	130.979	0.872648
Dead	80.5402	0.582057
Live	124.256	0.887134
Dead	75.5466	0.596587
Live	114.229	0.780377
Dead	53.8728	0.421765
Live	110.044	0.79806
Live	118.294	0.681228
Dead	112.131	0.568175
Dead	66.6392	0.309742
Dead	51.2042	0.648391
Dead	62.8452	0.552532
Dead	124.042	0.272161
Dead	136.447	0.906102
Dead	109.439	0.638862
Dead	76.6175	0.269255
Dead	67.377	0.793057
Dead	56.989	0.655677
Dead	107.002	0.79747
Dead	120.117	0.699055
Dead	112.288	0.710816
Dead	105.277	0.676111
Dead	116.492	0.660859
Dead	79.6386	0.592392
Dead	77.5283	0.654297
Dead	95.214	0.37209
Dead	100.712	0.58878
Dead	137.079	0.321385
Dead	122.761	0.87035
Dead	112.815	0.836861
Dead	86.3214	0.463995
Dead	75.3662	0.652902
Dead	69.6256	0.776818
Dead	64.503	0.678128
Dead	77.2412	0.673026
Dead	100.082	0.54474
Dead	137.027	1.27992
Dead	136.962	0.852658
Dead	136.489	0.939007
Dead	135.332	0.934706
Dead	125.988	0.82413
Dead	133.601	0.876703
Dead	68.6153	0.516645
Dead	59.4832	0.542498
Dead	59.5393	0.726424
Dead	82.2635	0.663059
Dead	78.1576	0.651254
Dead	97.6416	0.21513
Dead	64.6594	0.133327
