# Supplementary material for: Tracking Resilience to Infections by Mapping Disease Space
Source: PLoS Biol. 2016 Apr 18;14(4):e1002436. doi: 10.1371/journal.pbio.1002436 (PMC4835107; doi:10.1371/journal.pbio.1002436)
Supplement: S4 Table — The gene pairs producing looping areas over 11 are listed (referring to Fig 2) (See Methods for available code). (XLSX) [file pbio.1002436.s011.xlsx]

## Sheet: sheet1
Gene A	Gene B	Area	Cluster A	Cluster B		Cluster Combination	Frequency
Cd177	Bzrpl1	11.9605	14	1		14&9	87
Timm8b	Trim59	11.8799	14	1		14&1	94
Lcn2	Slc38a5	11.8694	19	9		14&12	10
Gpx4	Trim59	11.8613	19	1		19&12	3
Pfdn5	Mthfd2	11.8009	14	9		19&1	24
Pfdn5	Mthfd2	11.7541	14	9		19&9	21
Klf9	Bzrpl1	11.7486	14	1		12&7	7
Rnasek	AW146242	11.7292	14	1		7&9	20
Timm8b	Fgfr1op2	11.7284	14	9		19&13	0
Vdac3	Mthfd2	11.7146	14	9		19&10	0
1100001G20Rik	Bzrpl1	11.6953	14	1		12&10	0
Gpx4	Mthfd2	11.677	19	9
Apoe	AW146242	11.6248	14	1
Lcn2	Iap	11.6145	19	9
Cd177	AW146242	11.6026	14	1
Pglyrp1	Slc38a5	11.5957	14	9
Fbxw5	AW146242	11.5941	14	1
Suv420h2	Trim59	11.5832	14	1
Fbxw5	Fgfr1op2	11.5826	14	9
Clec1b	AW146242	11.5807	14	1
Fbxw5	Mthfd2	11.5634	14	9
Ndufb9	Trim59	11.5516	19	1
Cyb5r3	Fgfr1op2	11.5513	14	9
Ndufv2	Mthfd2	11.5383	14	9
Gpsn2	Mthfd2	11.5359	14	9
Apoe	Trim59	11.5353	14	1
1100001G20Rik	AW146242	11.5324	14	1
Gpsn2	Trim59	11.5321	14	1
Cyb5r3	AW146242	11.5253	14	1
Bola2	Iap	11.523	14	9
Ngp	Bzrpl1	11.5222	14	1
Timm8b	Mthfd2	11.5214	14	9
Klf9	LOC380691	11.5156	14	1
Suv420h2	Mthfd2	11.5153	14	9
Flot1	Mthfd2	11.5148	14	9
Chi3l1	Bzrpl1	11.5116	14	1
Aco2	Trim59	11.4993	14	1
Klf9	Slc38a5	11.4832	14	9
Samd14	Mthfd2	11.4814	19	9
Pglyrp1	Iap	11.4738	14	9
Psmb7	Mthfd2	11.4715	19	9
Iap	Alox5ap	11.4705	7	9
LOC100045359	Mthfd2	11.47	14	9
Apoe	Mthfd2	11.469	14	9
Bloc1s1	Fgfr1op2	11.4665	14	9
Hcst	Iap	11.4591	14	9
Clec1b	Bzrpl1	11.4532	14	1
Rnasek	Fgfr1op2	11.4386	14	9
Iap	Retnlg	11.4378	7	9
1110067D22Rik	Bzrpl1	11.4288	14	1
Fbxw5	Trim59	11.4218	14	1
Asah3l	Ctsf	11.4213	14	12
Pbrm1	Retnlg	11.4189	12	7
Ifitm6	Bzrpl1	11.4164	14	1
Chi3l1	Slc38a5	11.4117	14	9
Cd177	LOC380691	11.4074	14	1
Slc38a5	Retnlg	11.4063	7	9
AW146242	Treml1	11.3979	1	7
Rnasek	Mthfd2	11.3951	14	9
Prr13	Mthfd2	11.3867	19	9
Chi3l1	Iap	11.38	14	9
Hcst	Pbrm1	11.3773	14	12
Lrg1	Slc38a5	11.372	14	9
Uqcrc1	Mthfd2	11.3635	14	9
Cd93	Bzrpl1	11.3621	14	1
Rnasek	Mkrn1	11.3607	14	9
Klf9	AW146242	11.3355	14	1
Cyb5r3	Trim59	11.3317	14	1
Ndufv2	Fgfr1op2	11.3301	14	9
Maged2	Psg23	11.3285	14	12
Gpx4	1200016B10Rik	11.3279	19	1
Gpx4	Drctnnb1a	11.3252	19	1
Mthfd2	Sec11c	11.3238	7	9
Apoe	Fgfr1op2	11.3237	14	9
Siah1a	Ptp4a2	11.322	1	7
Gpx4	AW146242	11.3182	19	1
Bzrpl1	Treml1	11.3114	1	7
Ptgs1	Bzrpl1	11.3071	14	1
Vdac3	Trim59	11.3068	14	1
Hcst	Slc38a5	11.3029	14	9
Rnasek	Aqp9	11.2971	14	1
Lpcat3	Mthfd2	11.2906	14	9
Aco2	Mthfd2	11.2888	14	9
Gosr2	Mthfd2	11.2852	14	9
Klf9	Iap	11.2818	14	9
Bloc1s1	Mthfd2	11.2797	14	9
Lcn2	Ctsf	11.2796	19	12
Ap2m1	Siah1a	11.2772	19	1
Rnasek	Trim59	11.2714	14	1
Ngp	LOC380691	11.2711	14	1
Sec13	Siah1a	11.2647	19	1
Rnasek	Bzrpl1	11.2643	14	1
AW146242	Gp9	11.2558	1	7
Sort1	Bzrpl1	11.2552	14	1
Cops6	Usp25	11.2532	14	9
Mthfd2	Esd	11.2518	7	9
Sort1	AW146242	11.2486	14	1
Mthfd2	Treml1	11.2479	7	9
Pfdn5	Drctnnb1a	11.247	14	1
Pfdn5	Fgfr1op2	11.2458	14	9
Cyb5r3	Mkrn1	11.2416	14	9
BC002163	Trim59	11.2411	14	1
LOC100048480	Trim59	11.2385	19	1
Cops6	Mthfd2	11.2363	14	9
Lcn2	Bzrpl1	11.235	19	1
Suv420h2	AW146242	11.2341	14	1
LOC100048480	Mthfd2	11.2268	19	9
Gosr2	Trim59	11.2249	14	1
Anxa1	AW146242	11.2237	14	1
Fbxw5	Prdx2	11.223	14	9
Mthfd2	Vwf	11.2202	7	9
Arpc1a	Mthfd2	11.2181	14	9
Gpx4	Yod1	11.2178	19	1
Cd151	Trim59	11.2151	19	1
Apoe	Serinc3	11.2118	14	9
Apoe	Gypa	11.2113	14	9
Psmb7	Fgfr1op2	11.2109	19	9
Ndufb9	Mthfd2	11.2085	19	9
Gpx4	Lmo2	11.201	19	1
Camp	Bzrpl1	11.1983	14	1
Fbxw5	Epb4.9	11.1947	14	9
Arpc3	Mthfd2	11.1923	14	9
Cope	Trim59	11.1897	19	1
Gpx4	Yod1	11.1889	19	1
Ltf	Bzrpl1	11.1881	14	1
Mrvi1	AW146242	11.1855	14	1
Timm8b	AW146242	11.1838	14	1
Siah1a	Rpa1	11.1803	1	7
Prei4	Alox5ap	11.1802	7	9
Abca7	Mthfd2	11.1755	14	9
Vdac3	Siah1a	11.1751	14	1
Ifitm6	Iap	11.1726	14	9
Sort1	Bzrpl1	11.1724	14	1
Gpx4	Atg12	11.1701	19	1
Timm8b	Drctnnb1a	11.1674	14	1
Mthfd2	Ptpn11	11.167	7	9
Bloc1s1	AW146242	11.1642	14	1
Pfdn5	Trim59	11.1633	14	1
Uqcrc1	Fgfr1op2	11.1632	14	9
Mthfd2	Gp9	11.163	7	9
Fgfr1op2	Esd	11.1616	7	9
Cope	Mthfd2	11.1606	19	9
Suv420h2	Fgfr1op2	11.1509	14	9
Prps1	Retnlg	11.1477	12	7
Peci	Mthfd2	11.1477	14	9
Pdlim7	AW146242	11.1446	14	1
Chi3l1	AW146242	11.1423	14	1
LOC100045359	AW146242	11.1413	14	1
Mthfd2	Actb	11.1411	7	9
Suv420h2	Drctnnb1a	11.1406	14	1
Ap2m1	Mthfd2	11.1363	19	9
1100001G20Rik	Aqp9	11.1345	14	1
Pfdn5	Drctnnb1a	11.1338	14	1
Gpsn2	Fgfr1op2	11.1337	14	9
1100001G20Rik	LOC380691	11.1297	14	1
Ndufs3	Trim59	11.1297	19	1
Lcn2	Prei4	11.1294	19	9
Gnaz	Bzrpl1	11.129	14	1
Ptgs1	AW146242	11.1283	14	1
Chmp2a	Mthfd2	11.1283	14	9
Chi3l1	Prdx2	11.1278	14	9
Pfdn5	AW146242	11.1266	14	1
BC002163	Fgfr1op2	11.124	14	9
Lcn2	4930570C03Rik	11.124	19	9
Gpx4	Usp25	11.1209	19	9
Slc38a5	Alox5ap	11.1207	7	9
P2rx1	AW146242	11.1199	14	1
Pfdn5	AW146242	11.114	14	1
Aco2	Fzr1	11.1133	14	9
Uqcrc1	Usp25	11.1129	14	9
Bola2	Prei4	11.1127	14	9
Cops6	Mat2b	11.1105	14	9
Asah3l	Slc38a5	11.1082	14	9
Vdac3	Drctnnb1a	11.1081	14	1
Siah1a	Cul3	11.108	1	7
Suv420h2	1200016B10Rik	11.1074	14	1
Selp	Bzrpl1	11.1063	14	1
Lcn2	Pbrm1	11.1063	19	12
Peci	Trim59	11.1057	14	1
Fgfr1op2	Sec11c	11.1037	7	9
Anxa1	Bzrpl1	11.1034	14	1
Pfdn5	Trim59	11.1032	14	1
Fbxw5	Fzr1	11.1001	14	9
Chi3l1	Prdx2	11.1	14	9
Ngp	Ctsf	11.0997	14	12
Siah1a	Smap2	11.0969	1	7
Prei4	Retnlg	11.0961	7	9
Apoe	Bzrpl1	11.0948	14	1
Rbpms2	Bzrpl1	11.0945	14	1
Gpx4	Cat	11.0937	19	9
Mthfd2	AU023871	11.0932	7	9
Fbxw5	Gypa	11.0932	14	9
Cyb5r3	Mthfd2	11.0917	14	9
Dtnbp1	Bzrpl1	11.091	14	1
Gpx4	Fgfr1op2	11.0905	19	9
Flot1	Trim59	11.0902	14	1
Fbxw5	Drctnnb1a	11.0856	14	1
Ap2m1	Esco2	11.0847	19	9
Psg23	Ppbp	11.0794	12	7
Chi3l1	Ctsf	11.0778	14	12
2310039H08Rik	Fgfr1op2	11.0748	14	9
Gpsn2	AW146242	11.0748	14	1
Ngp	Slc38a5	11.0739	14	9
Pfdn5	Fgfr1op2	11.0726	14	9
P2rx1	Bzrpl1	11.0725	14	1
Hcst	Atp6v0d1	11.0725	14	12
Dtnbp1	AW146242	11.0717	14	1
Aco2	Fgfr1op2	11.0716	14	9
Hcst	Prei4	11.0696	14	9
Fbxw5	Mkrn1	11.0682	14	9
Chi3l1	Prei4	11.0679	14	9
Gpx4	Esco2	11.0677	19	9
Uqcrc1	Drctnnb1a	11.0673	14	1
AW146242	Vwf	11.0665	1	7
Fbxw5	Sh3yl1	11.0656	14	9
Mthfd2	Spcs1	11.0651	7	9
Ifitm6	Slc38a5	11.0645	14	9
Yif1b	AW146242	11.0641	19	1
Timm17a	Trim59	11.064	14	1
Asns	Alox5ap	11.0635	12	7
Ndufb9	AW146242	11.0626	19	1
Sort1	AW146242	11.0624	14	1
Sord	1200016B10Rik	11.062	14	1
Uba1	Siah1a	11.0619	19	1
Ap2m1	1200016B10Rik	11.0607	19	1
Pglyrp1	Pbrm1	11.059	14	12
Mthfd2	Ilk	11.0587	7	9
Ctsf	Retnlg	11.058	12	7
Ltb4r1	AW146242	11.0577	14	1
Psmb7	Trim59	11.0575	19	1
Gp1bb	AW146242	11.0568	19	1
Lrg1	Bzrpl1	11.0557	14	1
Pbrm1	Alox5ap	11.0546	12	7
Lrg1	Iap	11.0535	14	9
Timm8b	Mkrn1	11.051	14	9
Eif3i	Mthfd2	11.0473	14	9
Trim59	Esd	11.0465	1	7
2010002N04Rik	Bzrpl1	11.0463	14	1
Ifitm6	AW146242	11.0462	14	1
Etfb	Trim59	11.046	14	1
Entpd4	Mthfd2	11.0431	14	9
Ndufs3	Mthfd2	11.0423	19	9
Dad1	Mthfd2	11.0406	14	9
1100001G20Rik	Iap	11.0399	14	9
Anxa1	Mthfd2	11.0397	14	9
Bzrpl1	Vwf	11.0361	1	7
Asah3l	Bzrpl1	11.0353	14	1
Rnasek	Dclre1b	11.0352	14	9
BC002163	Mthfd2	11.0331	14	9
1110067D22Rik	AW146242	11.0326	14	1
Map2k2	Retnlg	11.0302	12	7
LOC100045359	Fgfr1op2	11.03	14	9
Asah3l	LOC100047214	11.0285	14	12
Ndufv2	Trim59	11.026	14	1
LOC100048807	Bzrpl1	11.0245	14	1
Gosr2	Fgfr1op2	11.0238	14	9
Cd151	Mthfd2	11.0237	19	9
Samd14	AW146242	11.0233	19	1
Ckb	Iap	11.0233	14	9
Mthfd2	Atp2a3	11.0227	7	9
Gpsn2	Drctnnb1a	11.021	14	1
Apoe	Aqp9	11.0208	14	1
Cops6	Trim59	11.0208	14	1
Serpinb6a	Mthfd2	11.0179	14	9
Fbxw5	Asns	11.0169	14	12
Cyb5r3	Bzrpl1	11.0157	14	1
Gpx4	Mat2b	11.0135	19	9
Peci	Fgfr1op2	11.0126	14	9
Prdx2	Esd	11.0111	7	9
Hcst	Bzrpl1	11.0095	14	1
Bola2	Pbrm1	11.0091	14	12
Timm8b	Aqp9	11.0066	14	1
Cyb5r3	Aqp9	11.006	14	1
AW146242	Esd	11.0046	1	7
Pdlim7	Mthfd2	11.0013	14	9
Lcn2	LOC100047214	11.001	19	12
Psmb7	Drctnnb1a	11.0005	19	1
